# Supplementary material for: Peroxide detected in imidazolium-based ionic liquids and approaches for reducing its presence in aqueous and non-aqueous environments
Source: Royal Society of Chemistry journal article supplement (doi:10.1039/c5ra01080b), 2015-01-01

# Peroxide detected in imidazolium-based ionic liquids and approaches for reducing its presence in aqueous and non-aqueous environments

*Julie L.L. Carter,<sup>a</sup> Catherine C. Santini,<sup>b</sup> Loïc J. Blum,<sup>a</sup> and Bastien*

*Doumèche,<sup>a</sup>*

<sup>a</sup> GEMBAS (Génie Enzymatique, Membranes Biomimétiques, et Assemblage  
Supramoléculaires) ICBMS UMR 5246 - Université Lyon 1 - CNRS

<sup>b</sup> C2P2 (Chemistry, Catalysis, Polymers and Processes) UMR 5265 -  
Université Lyon 1 - CNRS - CPE

43 bd du 11 Novembre 1918, 69622 Villeurbanne Cedex, France

Email : [doumeche@univ-lyon1.fr](mailto:doumeche@univ-lyon1.fr)

Fax : + (33) 472 44 79 70

Tel : + (33) 472 43 14 84

## Materials and Methods

### *Chemicals*

Methylimidazole (99%), trimethyl phosphate,  $\beta$ -nicotinamide adenine dinucleotide sodium salt, horseradish peroxidase (E.C. 1.11.1.7, 330 U mL<sup>-1</sup>) and hydrogen peroxide 30% (w/w) were obtained from Sigma-Aldrich (Saint Q. Fallavier, France). Commercial ILs are: 1,3-dimethylimidazolium dimethylphosphate (98%) from Iolitec GmbH (Denzlingen, Germany), 1-Ethyl-3-methylimidazolium diethylphosphate (98%) from Solvent Innovation GmbH (Cologne, Germany), 1-Ethyl-3-methylimidazolium ethylsulfate from Alfa Aesar (Karlsruhe, Germany), 1-Butyl-3-methylimidazolium hexafluorophosphate (98.5%) and 1-Butyl-3-methylimidazolium octylsulfate (95%) from Fluka (Steinheim, Germany), 1-Butyl-3-methylimidazolium acetate (98%), 1-Butyl-3-methylimidazolium dicyanamide (98%) and 1-Butyl-1-methylpyrrolidinium dicyanamide from Solvionic (Toulouse, France). ABTS (2,2'-azino-bis(3-ethylbenzothiazoline-6-sulphonic acid) came from Interchim (Montluçon, France). Catalase (E.C. 1.11.1.6, bovine liver, 200 kU mL<sup>-1</sup>) and Jacobsen catalyst ((R,R)-(-)-N,N-Bis(3,5-di-tert-butylsalicylidene)-1,2-cyclohexanediamino-manganese (III) chloride)) was from Fluka (Steinheim, Germany).

### *Synthesis of N, N-dimethylimidazolium dimethyl phosphate*

Methylimidazole (1.47 g, 0.018 mmol), used directly from the manufacturer or redistilled under vacuum, was added drop-wise under argon to ice-cold trimethyl phosphate (2.52 g, 0.018 mmol). The reaction mixture was allowed to warm to room temperature before being heated at 80°C for 24 hours under argon and protected from light. After cooling to room temperature, the remaining substrate was removed under vacuum pressure for 24 h at 80°C with stirring. The optical quality of the resulting product [MMIm][Me<sub>2</sub>PO<sub>4</sub>] was analyzed by

UV-vis spectroscopy. The formed product (yield = 97%) was a transparent, colorless, viscous liquid and was characterized by mass spectrometry (ESI<sup>+</sup>) with a THERMO LCQ Advantage instrument and by NMR with a Bruker DRX 300. The <sup>1</sup>H and <sup>31</sup>P NMR spectra were recorded in CD<sub>3</sub>CN. <sup>1</sup>H NMR (300 MHz, CD<sub>3</sub>CN, 25 °C): δ = 3.34 (d, J<sub>H,P</sub> = 10,37 Hz, 6H; CH<sub>3</sub>N), 3.85 (s, 6H, CH<sub>3</sub>O), 7.72 (d, J<sub>H-H</sub> = 1.45 Hz, 2H; CH=CH), 9.21 ppm (s, 1H; CH); <sup>31</sup>P NMR (400 MHz, CD<sub>3</sub>CN, 25 °C): δ = 1.82 ppm; MS (EI<sup>+</sup>) : m/z 97.1 (100) [MMIm<sup>+</sup>]; MS (EI<sup>-</sup>): m/z 125.1 (100) [Me<sub>2</sub>PO<sub>4</sub><sup>-</sup>].

### ***Vacuum evaporation***

The newly synthesized [MMIm][Me<sub>2</sub>PO<sub>4</sub>] was subjected to vacuum evaporation while being heated to 80 °C for 12 h under argon and protected from light while stirring in order to remove any excess methylimidazole or trimethyl phosphate. A sample was characterized by <sup>1</sup>H-NMR and <sup>31</sup>P-NMR (vide supra).

### ***Horseradish peroxidase activity assay***

H<sub>2</sub>O<sub>2</sub> concentration was measured from the formation of oxidized ABTS in the presence of HRP after 5 minutes by measuring the absorbance at 420 nm ( $\epsilon_M^{420 \text{ nm}} = 2.06 \cdot 10^4 \text{ M}^{-1} \text{ cm}^{-1}$ ) with a Tecan Infinite M200 (Salzburg, Austria) microtitre plate reader at 25 °C. A single well contained enzyme solution (10  $\mu$ L, 1.3 U mg<sup>-1</sup>), ABTS (10  $\mu$ L, 2 mM) and either 15  $\mu$ L of [MIm], 15  $\mu$ L [Me<sub>3</sub>PO<sub>4</sub>] or 15  $\mu$ L of ionic liquid in potassium phosphate buffer (20 mM, pH 7.6) for a final volume of 100  $\mu$ L. For solutions containing catalase or the salen-manganese complex, 2 U mg<sup>-1</sup> of catalase or 80  $\mu$ g of salen were added using the same protocol as above. The absorbance of a zero standard sample without HRP was measured for each sample. Dilutions ranging from 0  $\mu$ M – 45  $\mu$ M of a 30% H<sub>2</sub>O<sub>2</sub> solution were prepared and 10  $\mu$ L of each one added per well in order to calculate initial H<sub>2</sub>O<sub>2</sub> concentrations in the samples. The absorbance of the zero assays was subtracted from all other absorbance

measurements. The absorbance measured was plotted in function of  $\text{H}_2\text{O}_2$  concentration and the line used to determine the initial  $\text{H}_2\text{O}_2$  concentration in the sample. The calculated values obtained are the average of at least 3 measurements and are expressed in  $\mu\text{M}$  in the neat IL.

**<sup>1</sup>H-NMR spectra of academic-synthesized [MMIm][Me<sub>2</sub>PO<sub>4</sub>] using redistilled MIm after vacuum evaporation**

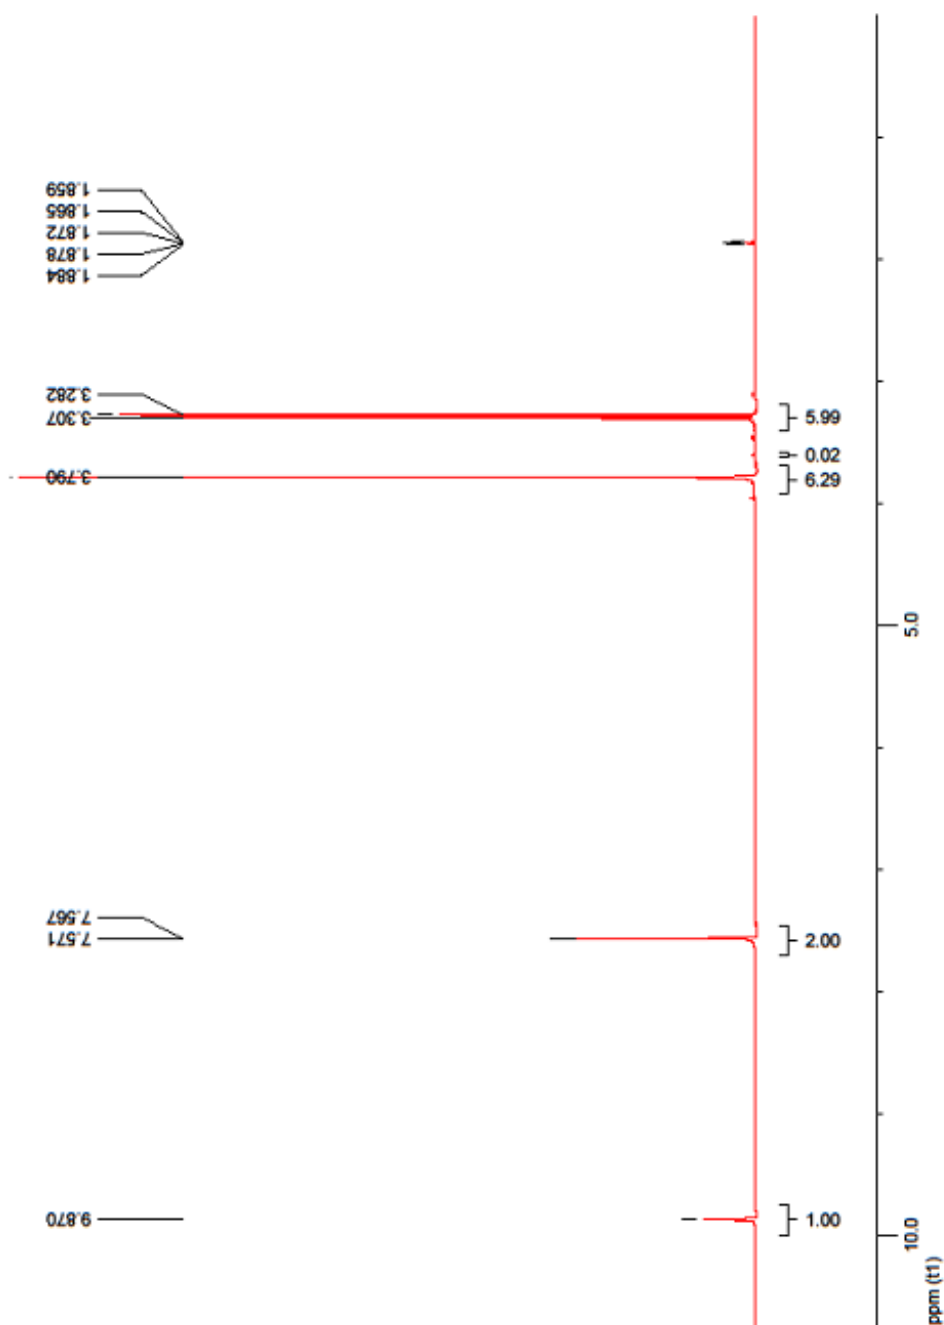

**<sup>1</sup>H-NMR spectra of synthesized [MMIm][Me<sub>2</sub>PO<sub>4</sub>] synthesized using non-redistilled MIm after vacuum evaporation**

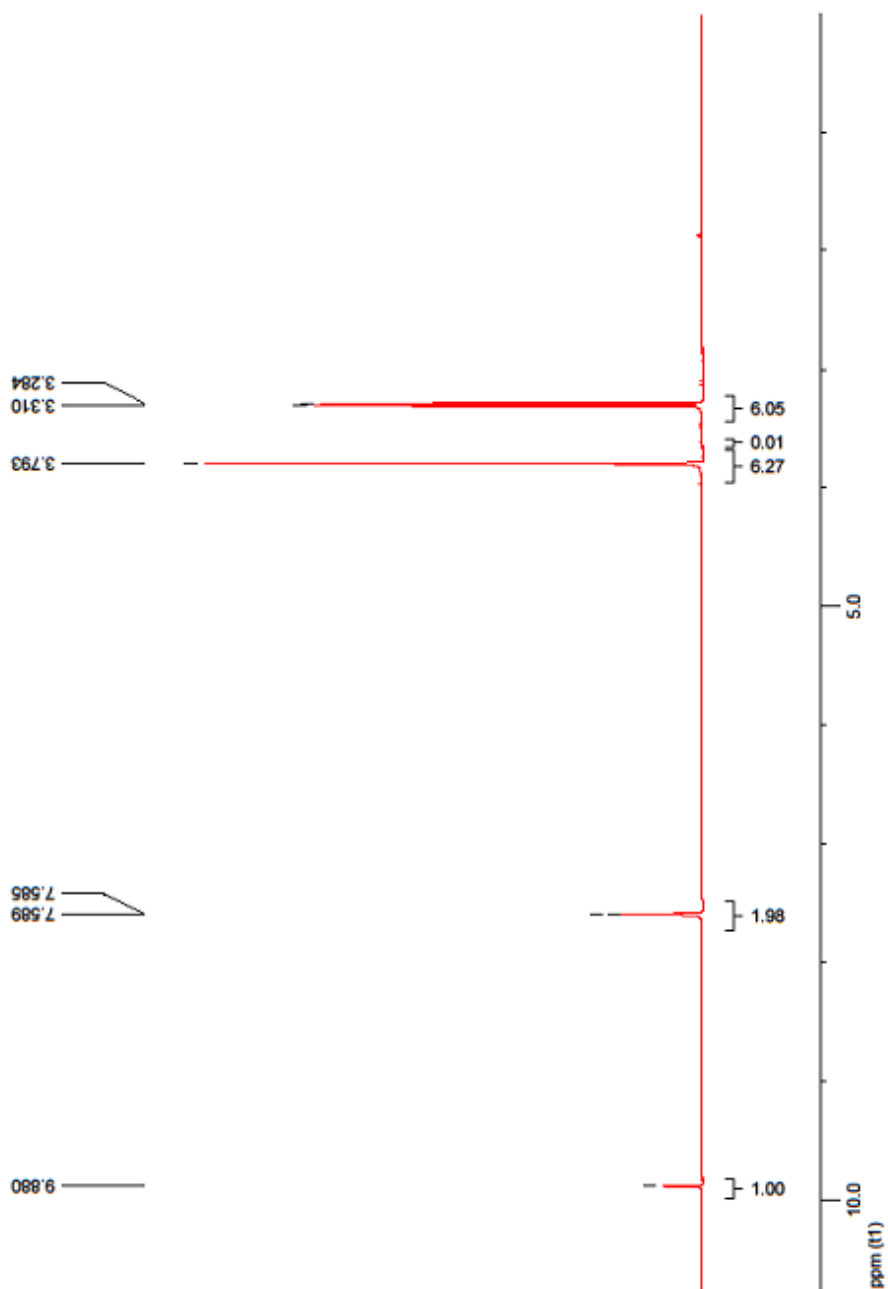

**$^{31}\text{P}$ -NMR spectra of  $[\text{MIm}][\text{Me}_2\text{PO}_4]$  synthesized using redistilled MIm before vacuum evaporation**

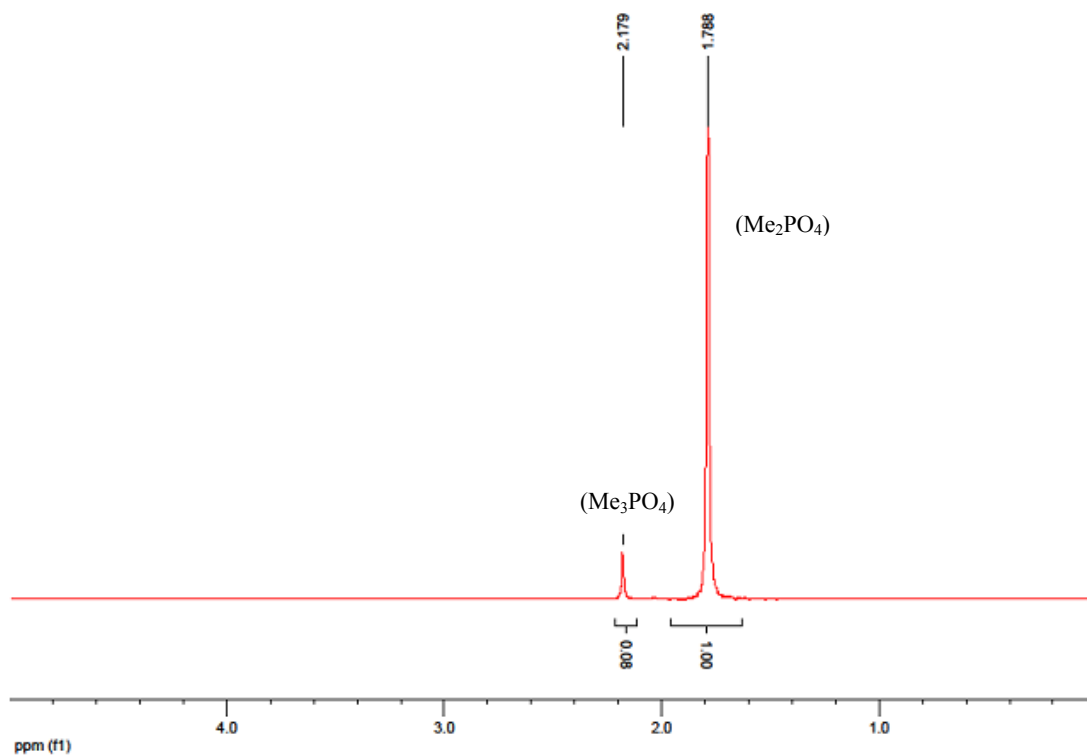

**$^{31}\text{P}$ -NMR spectra of  $[\text{MIm}][\text{Me}_2\text{PO}_4]$  synthesized using redistilled MIm after vacuum evaporation**

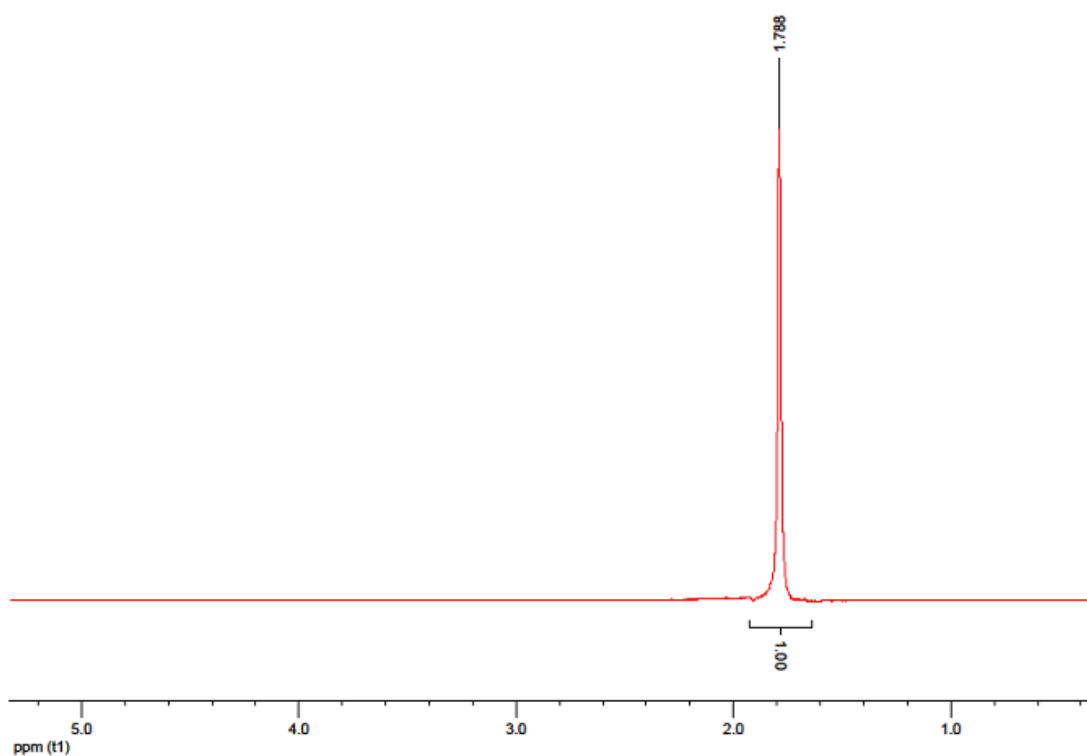

**$^{31}\text{P}$ -NMR spectra of  $[\text{MMIm}][\text{Me}_2\text{PO}_4]$  synthesized using non-redistilled MIm before vacuum evaporation**

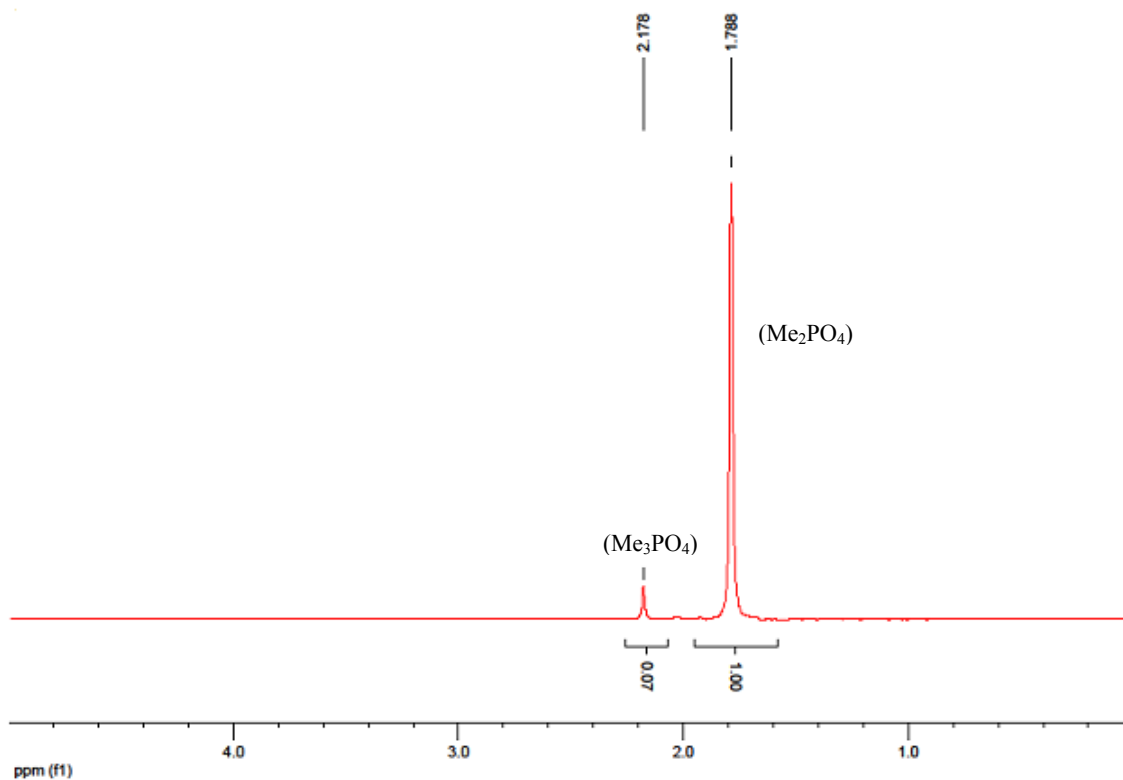

**$^{31}\text{P}$ -NMR spectra of  $[\text{MMIm}][\text{Me}_2\text{PO}_4]$  synthesized using non-redistilled MIm after vacuum evaporation**

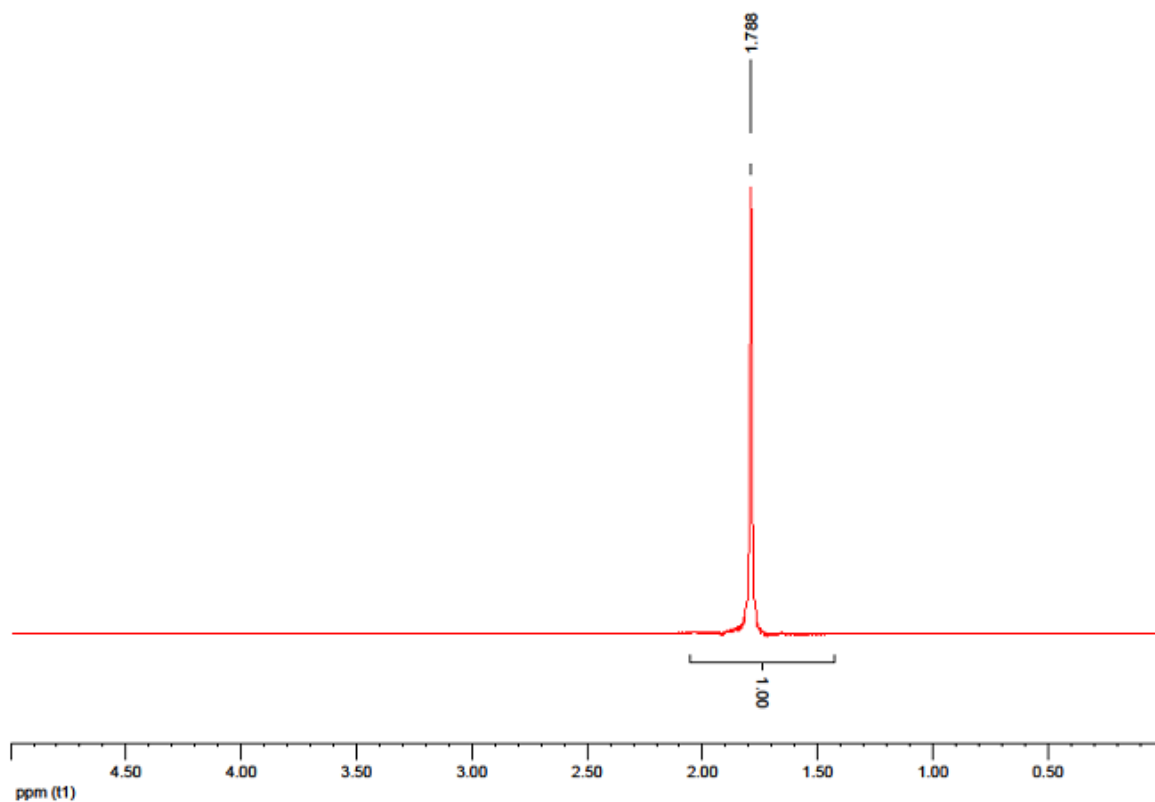



Dosage of  $\text{H}_2\text{O}_2$  using standard curves to calculate the peroxide concentration in [MMIm][ $\text{Me}_2\text{PO}_4$ ] synthesized from non-redistilled MIm ( $\blacktriangle$ ) and redistilled MIm ( $\blacksquare$ ) before vacuum evaporation for 24h at  $80^\circ\text{C}$  and [MMIm][ $\text{Me}_2\text{PO}_4$ ] synthesized from non-redistilled MIm ( $\triangle$ ) and redistilled MIm ( $\square$ ) after vacuum evaporation.  $\text{H}_2\text{O}_2$  concentration after catalase addition is also shown. All measurements are performed in triplet in 15% (v/v) [MMIm][ $\text{Me}_2\text{PO}_4$ ], [HRP]  $1.30 \text{ U mL}^{-1}$ , [ABTS]  $2 \text{ mM}$ , [ $\text{H}_2\text{O}_2$ ]  $0\text{-}45 \text{ }\mu\text{M}$  and phosphate buffer pH 7.6,  $20 \text{ mM}$  at  $25^\circ\text{C}$ .

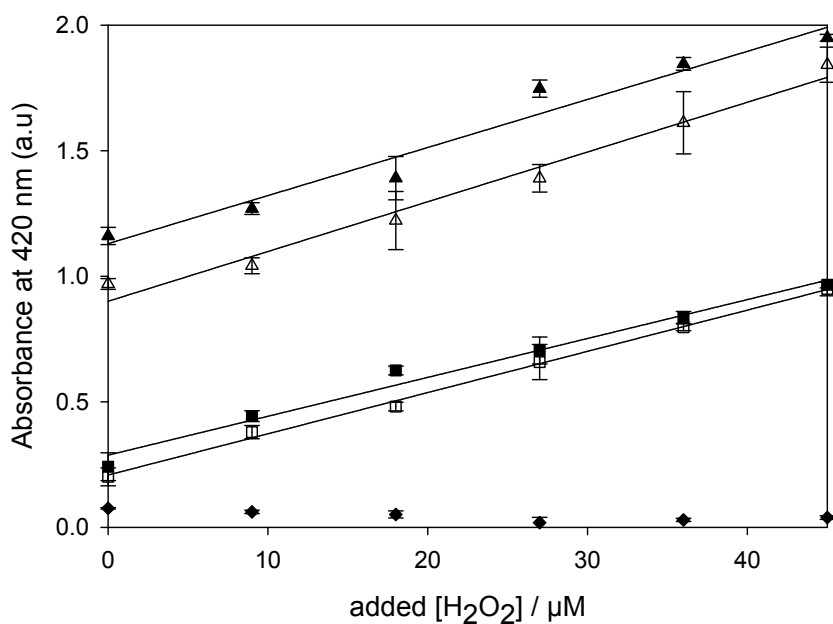

UV-vis spectra of [MMIm][Me<sub>2</sub>PO<sub>4</sub>] synthesized with (1) non-redistilled MIm and (2) redistilled MIm (IL is synthesized as described in the experimental section).

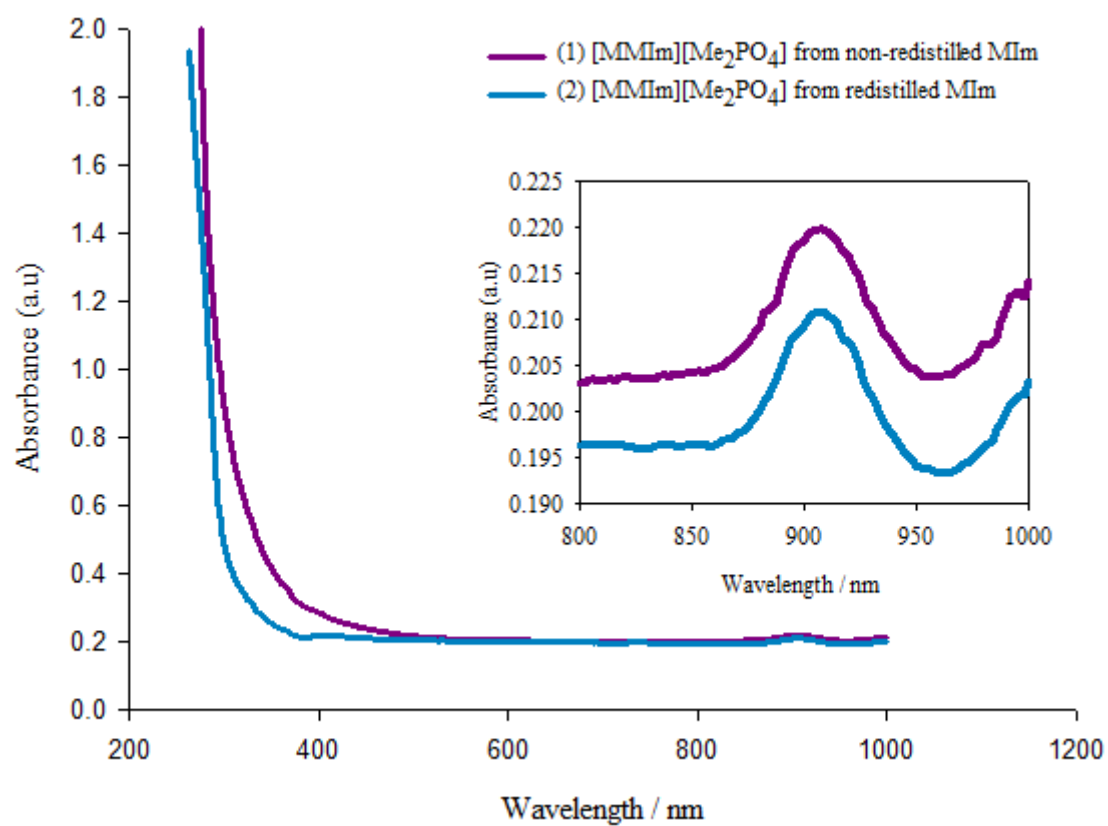

Supplement: c5ra01080b1.pdf [file c5ra01080b1.pdf]
